# Supplementary material for: Alginate Microencapsulation of Human Islets Does Not Increase Susceptibility to Acute Hypoxia
Source: Hindawi journal article supplement (doi:10.1155/2013/374925), 2013-01-01
Supplement: f1 [file 374925.f1.pdf]

**Supplementary information on measurements of immune mediators as assayed by the Bio-Plex Panel.**

Table S1 gives intra assay variations. Table S2 and Figure S1 presents information on immune mediators for which measurements came out close to the detection limit. Tables S3 and S4 compares secretion during and after the 8h hypoxic period.

**Table S1**

Intra assay variations in the multiplex analysis

|       | CV (%) for observed concentrations |        |              |
|-------|------------------------------------|--------|--------------|
|       | Mean                               | Median | Range        |
| IL-6  | 7.02                               | 3.88   | 0.16 – 33.95 |
| IL-9  | 16.36                              | 12.94  | 0.24 – 73.44 |
| IL-12 | 13.33                              | 11.33  | 0.91 – 60.12 |
| IL-8  | 6.83                               | 4.82   | 0.10 – 28.62 |
| MCP-1 | 4.61                               | 3.52   | 0.09 – 15.49 |
| VEGF  | 6.98                               | 4.76   | 0.30 – 27.75 |

**Table S2**

Effect of hypoxia on islet secreted mediators as measured by H/N ratios (fold increase by hypoxia)

|        | Encapsulated islets |        | Non-encapsulated islets |        |
|--------|---------------------|--------|-------------------------|--------|
|        | Mean $\pm$ SEM      | Median | Mean $\pm$ SEM          | Median |
| IL-10  | 1.37 $\pm$ 0.39     | 1.00   | 1.66 $\pm$ 0.12*        | 0.56   |
| MIP-1b | 1.20 $\pm$ 0.16     | 1.04   | 1.64 $\pm$ 0.47         | 1.18   |
| IL-1ra | 1.28 $\pm$ 0.26     | 1.09   | 1.22 $\pm$ 0.14         | 1.31   |
| GM-CSF | 1.33 $\pm$ 0.10*    | 1.18   | 2.09 $\pm$ 1.03         | 1.02   |
| MIF    | 4.07 $\pm$ 1.13*    | 2.49   | 4.12 $\pm$ 1.01*        | 2.99   |

\*p < 0.05 for the effect of hypoxia. Data represents 11-13 single experiments (one sample per condition), one-five experiments per donor (five donors). H/N equals ratio of hypoxic to normoxic conditions.

**Table S3**

Accumulation of mediators during 8h of hypoxia as % of secretion during total incubation period (22-26h)

|       | Encapsulated islets |             | Non-encapsulated islets |             |
|-------|---------------------|-------------|-------------------------|-------------|
|       | Normoxia            | Hypoxia     | Normoxia                | Hypoxia     |
| IL-6  | 49.5 ± 11.5         | 29.6 ± 11.4 | 55.1 ± 6.9              | 11.7 ± 3.5  |
| IL-8  | 56.9 ± 9.5          | 47.6 ± 13.4 | 58.2 ± 8.9              | 30.4 ± 9.4  |
| MCP-1 | 41.9 ± 8.9          | 35.3 ± 10.6 | 56.0 ± 10.3             | 31.5 ± 11.3 |
| VEGF  | 39.0 ± 6.4          | 37.6 ± 8.1  | 41.6 ± 7.8              | 37.9 ± 8.2  |

Data are mean ± SEM of four separate experiments (one sample per condition), two experiments per donor (two donors). No significant differences could be detected.

**Table S4**

Secretion of mediators (pg/islet/h) after hypoxia exposure

|       | Secretion during | Encapsulated islets |  | Non-encapsulated islets     |  |
|-------|------------------|---------------------|--|-----------------------------|--|
|       |                  |                     |  |                             |  |
| IL-6  | 8h of hypoxia    | 0.050 ± 0.028       |  | 0.017 ± 0.007 <sup>ab</sup> |  |
|       | Re-oxygenation   | 0.074 ± 0.035       |  | 0.116 ± 0.069               |  |
| IL-8  | 8h of hypoxia    | 0.559 ± 0.285       |  | 0.153 ± 0.067 <sup>b</sup>  |  |
|       | Re-oxygenation   | 0.232 ± 0.078       |  | 0.190 ± 0.070 <sup>b</sup>  |  |
| MCP-1 | 8h of hypoxia    | 0.251 ± 0.092       |  | 0.142 ± 0.072 <sup>b</sup>  |  |
|       | Re-oxygenation   | 0.216 ± 0.080       |  | 0.128 ± 0.030               |  |
| VEGF  | 8h of hypoxia    | 0.310 ± 0.143       |  | 0.222 ± 0.091               |  |
|       | Re-oxygenation   | 0.244 ± 0.040       |  | 0.146 ± 0.025 <sup>b</sup>  |  |

Data are mean ± SEM of four separate experiments (one sample per condition), two experiments per donor (two donors).

<sup>a</sup>p < 0.07 for the comparison of secretion during 8h of hypoxia vs. the re-oxygenation period,

<sup>b</sup>p < 0.07 for comparison secretion by encapsulated vs. non-encapsulated islets exposed to hypoxia.

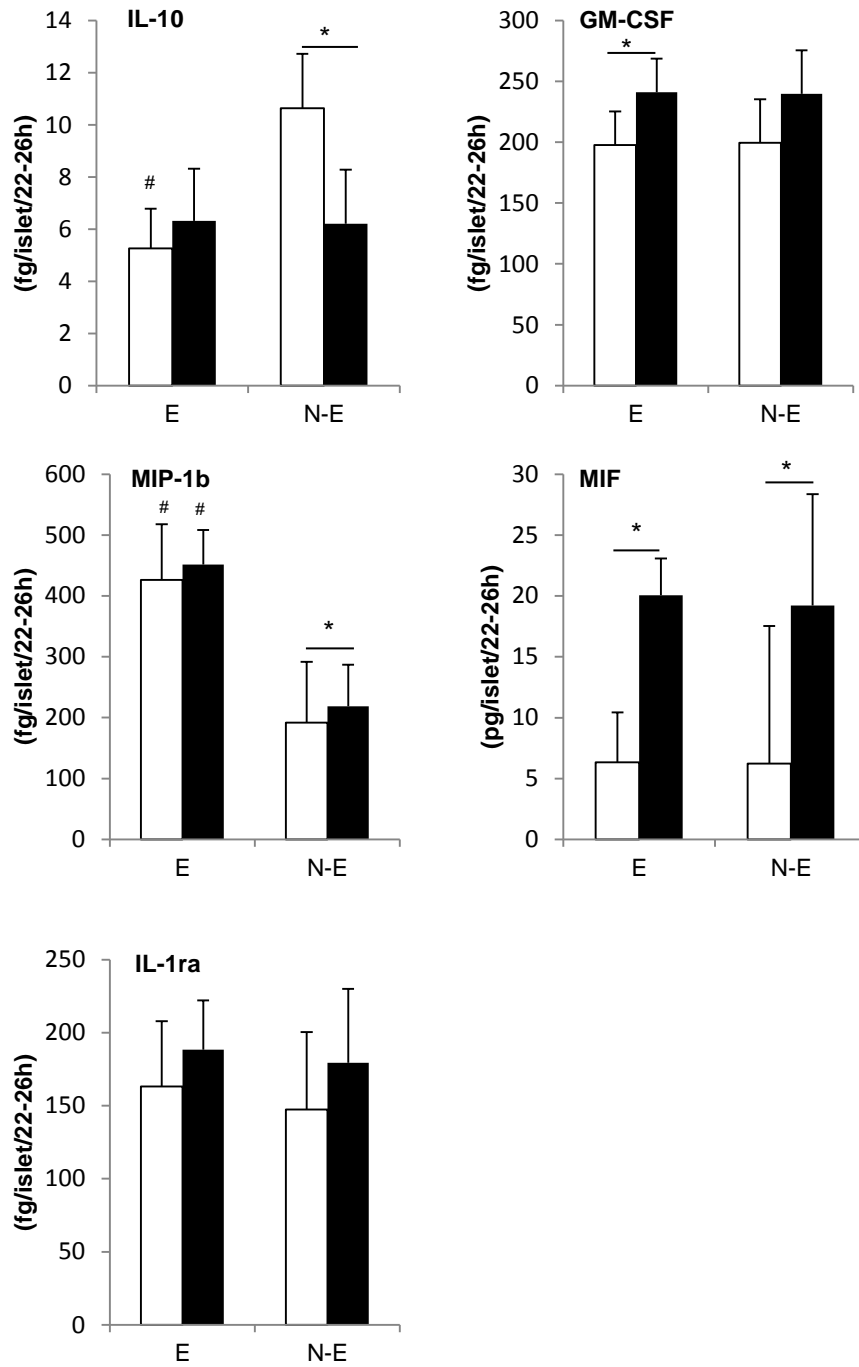

**Fig S1.** Secreted mediators from encapsulated (E) and non-encapsulated (N-E) islets following culture in continuous normoxia (open bars) and transient hypoxia (filled bars). \*P < 0.001-0.04 for the effect of hypoxia, #p < 0.05 for the effect of encapsulation during normoxia. Data are

mean  $\pm$  SEM of 13 separate experiments (one sample per condition), one-five experiments per donor (five donors).
